# Supplementary material
Source: MDPI journal article supplement (https://www.mdpi.com/2073-4441/10/10/1306)
Supplement: s1 [file s1]

# Quantitative analysis of membrane fouling mechanisms involved in microfiltration of humic acid-protein mixtures at different solution conditions

Chunyi Sun <sup>1</sup>, Na Zhang <sup>1</sup>, Fazhan Li <sup>2</sup>, Guoyi Ke <sup>3</sup>, Lianfa Song <sup>4</sup>, Xiaoqian Liu <sup>1</sup> and Shuang Liang <sup>1,\*</sup>

<sup>1</sup> Shandong Provincial Key Laboratory of Water Pollution Control and Resource Reuse, School of Environmental Science and Engineering, Shandong University, Jinan 250100, China; scy3735@163.com (C.S.); 15650576825@163.com (N.Z.); shl0701@163.com (X.L.)

<sup>2</sup> School of Environmental and Municipal Engineering, North China University of Water Resources and Electric Power, Zhengzhou 450046, China; lifazhan@ncwu.edu.cn

<sup>3</sup> Department of mathematics and Physical Sciences, Louisiana State University of Alexandria, 8100 Hwy 71 S, Alexandria, LA 71302-9119, USA; gke@lsua.edu

<sup>4</sup> Department of Civil and Environmental Engineering, Texas Tech University, 10th and Akron, Lubbock, TX 79409-1023, USA; lianfa.song@ttu.edu

\* Correspondence: liangshuang@sdu.edu.cn; Tel.: +86-531-88361712

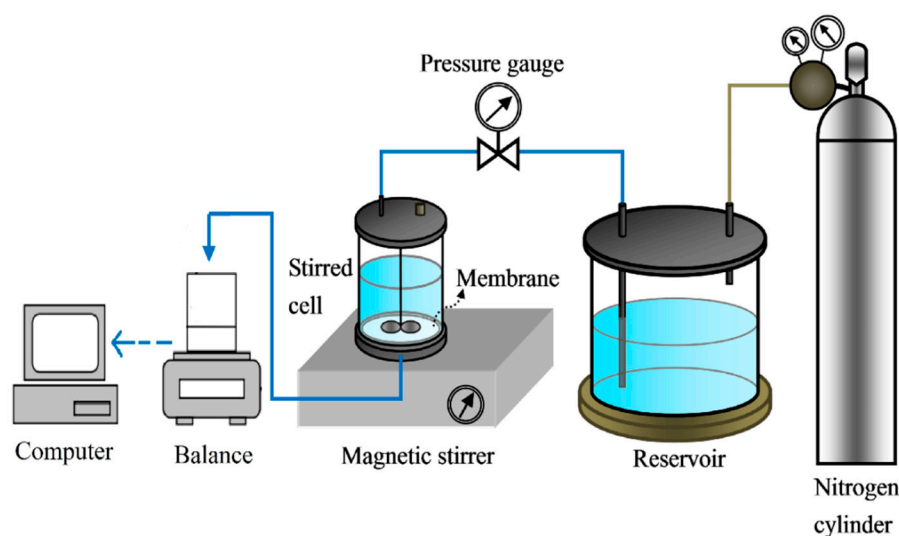

**Figure S1.** Schematic diagram of experimental system for constant pressure dead-end microfiltration.

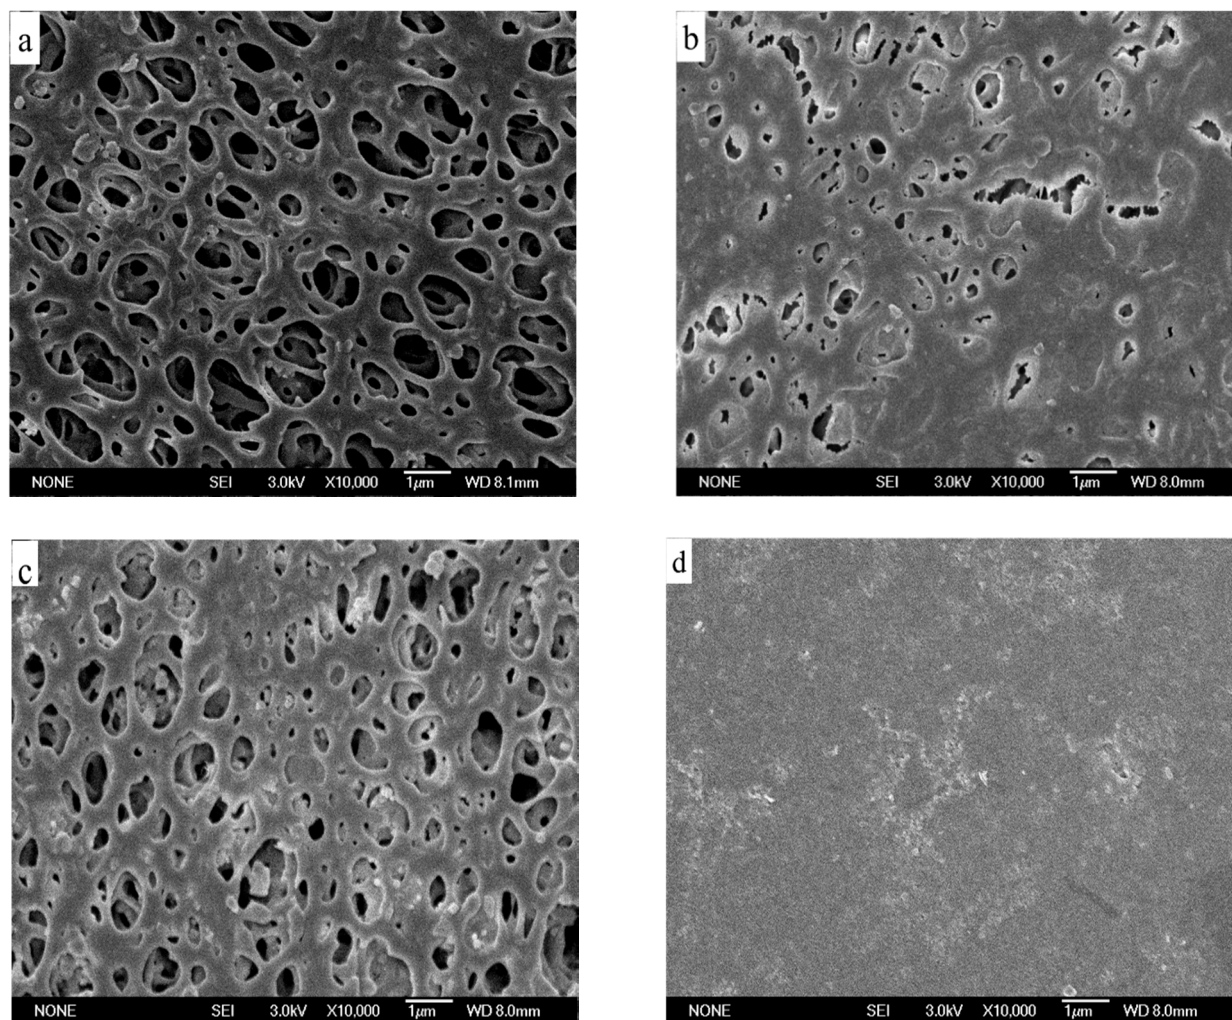

**Figure S2.** SEM characterization results at different solution conditions: (a) pH = 7.0, IS = 10 mM,  $c(\text{Ca}^{2+}) = 0$  mM; (b) pH = 3.0, IS = 10 mM,  $c(\text{Ca}^{2+}) = 0$  mM; (c) pH = 7.0, IS = 100 mM,  $c(\text{Ca}^{2+}) = 0$  mM; (d) pH = 7.0, IS = 10 mM,  $c(\text{Ca}^{2+}) = 1.0$  mM.
